# Supplementary material for: Magnitude of standard precautions practices among healthcare workers in health facilities of Low and Middle Income Countries: A systematic review and meta-analysis
Source: PLOS journal article supplement (doi:10.1371/journal.pone.0302282), 2024-04-30
Supplement: S2 (10.1371/journal.pone.0302282.s002) [file journal.pone.0302282.s002]

| Study Name                 | year | year category | Country  | Study design    | Study setting                             | Profession              | Sampling technique | Types of IPC practices assessed | Event | sample size |
|----------------------------|------|---------------|----------|-----------------|-------------------------------------------|-------------------------|--------------------|---------------------------------|-------|-------------|
| Umoh VA et al (2020)       | 2020 | >2015         | Nigeria  | Cross-sectional | Hospitals all type                        | All other types of HCWs | Random             | All others standard precautions | 24    | 51          |
| Adegboye MB et al (2018)   | 2018 | >2015         | Nigeria  | Cross-sectional | Hospitals all type                        | All other types of HCWs | Others             | Hand hygiene only               | 26    | 80          |
| Mursy SMM et al (2019)     | 2019 | >2015         | Sudan    | Cross-sectional | Hospitals all type                        | Nurses only             | Others             | All others standard precautions | 72    | 110         |
| Desta M et al (2018)       | 2018 | >2015         | Ethiopia | Cross-sectional | Hospitals all type                        | All other types of HCWs | Others             | All others standard precautions | 86    | 150         |
| Sarani et al (2015)        | 2015 | <=2015        | Iran     | Cross-sectional | Hospitals all type                        | Nurses only             | Random             | All others standard precautions | 71    | 170         |
| Assefa J et al (2020)      | 2020 | >2015         | Ethiopia | Cross-sectional | Hospitals and other healthcare facilities | All other types of HCWs | Random             | All others standard precautions | 94    | 171         |
| Iliyasu G et al (2016)     | 2016 | >2015         | Nigeria  | Cross-sectional | Hospitals all type                        | All other types of HCWs | Others             | Hand hygiene only               | 130   | 200         |
| Woldegioris T et al (2019) | 2019 | >2015         | Ethiopia | Cross-sectional | Hospitals all type                        | Nurses only             | Others             | All others standard precautions | 92    | 204         |
| Ngwa CH et al (2018)       | 2018 | >2015         | Cameron  | Cross-sectional | Hospitals all type                        | All other types of HCWs | Random             | All others standard precautions | 41    | 216         |
| Bekele I et al             | 2018 | >2015         | Ethiopia | Cross-sectional | Hospitals all type                        | Nurses only             | Others             | All others standard precautions | 148   | 231         |

|                           |      |        |          |                 |                                           |                         |        |                                 |     |     |
|---------------------------|------|--------|----------|-----------------|-------------------------------------------|-------------------------|--------|---------------------------------|-----|-----|
| Suliman M et al (2018)    | 2018 | >2015  | Jordan   | Cross-sectional | Hospitals all type                        | Nurses only             | Others | All others standard precautions | 161 | 247 |
| Tenna A et al (2013)      | 2013 | <=2015 | Ethiopia | Cross-sectional | Hospitals all type                        | All other types of HCWs | Others | Hand hygiene only               | 125 | 261 |
| Askarian M et al (2005)   | 2005 | <=2015 | Iran     | Cross-sectional | Hospitals all type                        | Nurses only             | Others | All others standard precautions | 53  | 270 |
| Hussen SH et al (2017)    | 2017 | >2015  | Ethiopia | Cross-sectional | Hospitals all type                        | All other types of HCWs | Others | All others standard precautions | 164 | 271 |
| Sahiledengle B (2019)     | 2019 | >2015  | Ethiopia | Cross-sectional | Hospitals all type                        | Nurses only             | Random | All others standard precautions | 134 | 273 |
| Yohanness T et al (2019)  | 2019 | >2015  | Ethiopia | Cross-sectional | Hospitals all type                        | All other types of HCWs | Random | All others standard precautions | 41  | 274 |
| Yazie TD et al (2019)     | 2019 | >2015  | Ethiopia | Cross-sectional | Hospitals all type                        | All other types of HCWs | Random | All others standard precautions | 162 | 282 |
| Hang Pham TT et al (2019) | 2019 | >2015  | Vietnam  | Cross-sectional | Hospitals and other healthcare facilities | All other types of HCWs | Random | All others standard precautions | 151 | 314 |
| Paudyal P et al (2008)    | 2008 | <=2015 | Nepal    | Cross-sectional | Hospitals all type                        | All other types of HCWs | Others | Hand hygiene only               | 227 | 324 |
| Temesgen C et al (2014)   | 2014 | <=2015 | Ethiopia | Others          | Hospitals all type                        | All other types of HCWs | Others | All others standard precautions | 206 | 326 |
| Engdaw GT et al (2019)    | 2019 | >2015  | Ethiopia | Cross-sectional | Hospitals all type                        | All other types of HCWs | Random | Hand hygiene only               | 50  | 335 |

|                                 |      |        |          |                 |                                           |                         |        |                                 |     |     |
|---------------------------------|------|--------|----------|-----------------|-------------------------------------------|-------------------------|--------|---------------------------------|-----|-----|
| Gulilat K et al (2014)          | 2014 | <=2015 | Ethiopia | Cross-sectional | Hospitals and other healthcare facilities | All other types of HCWs | Random | All others standard precautions | 192 | 354 |
| Ajibola S et al (2014)          | 2014 | <=2015 | Nigeria  | Cross-sectional | Hospitals all type                        | All other types of HCWs | Random | All others standard precautions | 23  | 372 |
| Hosseinalhashemi M et al (2015) | 2015 | <=2015 | Iran     | Cross-sectional | Hospitals all type                        | All other types of HCWs | Others | Hand hygiene only               | 121 | 377 |
| Mengesha A et al (2020)         | 2020 | >2015  | Ethiopia | Cross-sectional | Hospitals all type                        | Nurses only             | Others | All others standard precautions | 200 | 409 |
| Tadesse AW et al (2020)         | 2020 | >2015  | Ethiopia | Cross-sectional | Hospitals all type                        | All other types of HCWs | Random | All others standard precautions | 168 | 422 |
| Gebresillassie A et al (2014)   | 2014 | <=2015 | Ethiopia | Cross-sectional | Hospitals and other healthcare facilities | All other types of HCWs | Others | All others standard precautions | 207 | 483 |
| Sahiledengle B et al (2018)     | 2018 | >2015  | Ethiopia | Cross-sectional | Hospitals and other healthcare facilities | All other types of HCWs | Others | All others standard precautions | 400 | 605 |
| Arinze-Onyia SU et al (2018)    | 2018 | >2015  | Nigeria  | Cross-sectional | Hospitals all type                        | All other types of HCWs | Others | Hand hygiene only               | 208 | 629 |
| Geberemariyam BS et al (2018)   | 2018 | >2015  | Ethiopia | Cross-sectional | Hospitals and other healthcare facilities | All other types of HCWs | Others | All others standard precautions | 235 | 648 |

|                            |      |        |          |                 |                                           |                         |        |                                 |      |      |
|----------------------------|------|--------|----------|-----------------|-------------------------------------------|-------------------------|--------|---------------------------------|------|------|
| Laraqui O et al (2008)     | 2008 | <=2015 | Morocco  | Others          | Hospitals and other healthcare facilities | All other types of HCWs | Others | All others standard precautions | 1368 | 2086 |
| Kebede B et al (2015)      | 2015 | <=2015 | Ethiopia | Cross-sectional | Hospitals all type                        | All other types of HCWs | Others | Hand hygiene only               | 13   | 17   |
| Legese T et al (2015)      | 2015 | <=2015 | Ethiopia | Cross-sectional | Hospitals all type                        | All other types of HCWs | Others | Hand hygiene only               | 72   | 73   |
| Alemu B et al (2015)       | 2015 | <=2015 | Ethiopia | Cross-sectional | Hospitals all type                        | All other types of HCWs | Others | Hand hygiene only               | 32   | 47   |
| Zewde GT (2019)            | 2019 | >2015  | Ethiopia | Cross-sectional | Hospitals all type                        | All other types of HCWs | Random | Hand hygiene only               | 93   | 125  |
| Koech SJ et al 2021        | 2021 | >2015  | Kenya    | Cross-sectional | Hospitals all type                        | All other types of HCWs | Random | Hand hygiene only               | 150  | 301  |
| Ekwere T et al 2013        | 2013 | <=2015 | Nigeria  | Cross-sectional | Hospitals all type                        | All other types of HCWs | Random | Hand hygiene only               | 301  | 430  |
| Gajida Au et al 2020       | 2020 | >2015  | Nigeria  | Cross-sectional | Hospitals all type                        | All other types of HCWs | Others | Hand hygiene only               | 236  | 302  |
| Oluwagbemiga AO et al 2020 | 2020 | >2015  | Nigeria  | Cross-sectional | Hospitals and other healthcare facilities | All other types of HCWs | Random | Hand hygiene only               | 70   | 137  |
| Alemayehu R et al 2016     | 2016 | >2015  | Ethiopia | Cross-sectional | Hospitals all type                        | All other types of HCWs | Random | Hand hygiene only               | 205  | 208  |

|                      |      |        |          |                 |                    |                         |        |                                 |     |     |
|----------------------|------|--------|----------|-----------------|--------------------|-------------------------|--------|---------------------------------|-----|-----|
| Gezie H et al 2019   | 2019 | >2015  | Ethiopia | Cross-sectional | Hospitals all type | All other types of HCWs | Random | Hand hygiene only               | 56  | 191 |
| Jemal S 2018         | 2018 | >2015  | Ethiopia | Cross-sectional | Hospitals all type | All other types of HCWs | Random | Hand hygiene only               | 39  | 91  |
| Joshi SK et al 2013  | 2013 | <=2015 | Nepal    | Cross-sectional | Hospitals all type | All other types of HCWs | Others | Hand hygiene only               | 302 | 336 |
| Yallew WW et al 2015 | 2015 | <=2015 | Ethiopia | Cross-sectional | Hospitals all type | All other types of HCWs | Others | All others standard precautions | 232 | 422 |
| Asmr Y et al 2019    | 2019 | >2015  | Ethiopia | Cross-sectional | Hospitals all type | All other types of HCWs | Others | All others standard precautions | 77  | 128 |
| Abreha N 2018        | 2018 | >2015  | Ethiopia | Cross-sectional | Hospitals all type | Nurses only             | Others | All others standard precautions | 78  | 108 |
